# Supplementary material for: Non-covalent immobilization of homogeneous cationic chiral rhodium–phosphine catalysts on silica surfaces
Source: Royal Society of Chemistry journal article supplement (doi:10.1039/b003354p), 2000-01-01
Supplement: b003354p.doc [file b003354p.doc]

Supplementary Information for: Non-covalent immobilization of homogeneous cationic rhodium catalysts on silica surfaces. Francis M. de Rege, David K. Morita, Kevin C. Ott, William Tumas and Richard D. Broene*

Experimental

[(R,R)-Me-(DuPHOS)Rh(COD)]OTf/MCM-41 (**1**): [(R,R)-Me(DuPHOS)-Rh(COD)]OTf (200 mg, 3.00 x 10-4 mol) was dissolved in CH2Cl2 and combined with 3 g of MCM-41 in CH2Cl2. The slurry was stirred overnight during which time the solution became colorless and the heterogeneous material took on an orange color. The solids were isolated by filtration, washed with CH2Cl2 (3 x 10 mL) and placed under vacuum for several hours to provide a free flowing light yellow powder.

A typical hydrogenation reaction was carried out as follows. To an oven dried 0.5 L Fischer-Porter bottle equipped with a sampling port and a pressure gauge in the drybox was added the substrate (25 mg), the catalyst (20 mg), and 20 mL hexane. The flask was sealed and moved to a Schlenk line. The vessel was degassed by exposure to vacuum (2 x ~10 sec) followed each time by exposure to hydrogen and finally brought to the desired pressure. Vigorous stirring was maintained by a 3 cm magnetic stirring bar with a constant setting on the magnetic stirrer. For control reactions in hexane, the more hexane soluble [(R,R)-Me-(DuPHOS)Rh(COD)]BArF was used as a catalyst. The reactions were carried out analogously, with the exception that 2 mg of [(R,R)-Me-(DuPHOS)Rh(COD)]BArF were used. Enantiomeric excesses were calculated from the integrated chromatograms from the analysis of the liquid phase with the chiral Val-L column and are reported as the average of two or more reactions.
